# Supplementary material for: Insight into the non-covalent interaction mechanism between peanut protein and inulin
Source: Research Square preprint supplement (doi:10.21203/rs.3.rs-8217333/v1), 2025-12-16

**Insight into the non-covalent interaction mechanism between peanut protein and inulin from the perspective of time-effectiveness maintenance of cold plasma**

Wenjie Fu, Keyuan Wang, Jiaojiao Yu*, Xiaojuan Tang, Shanli Peng*, Hui Ji*


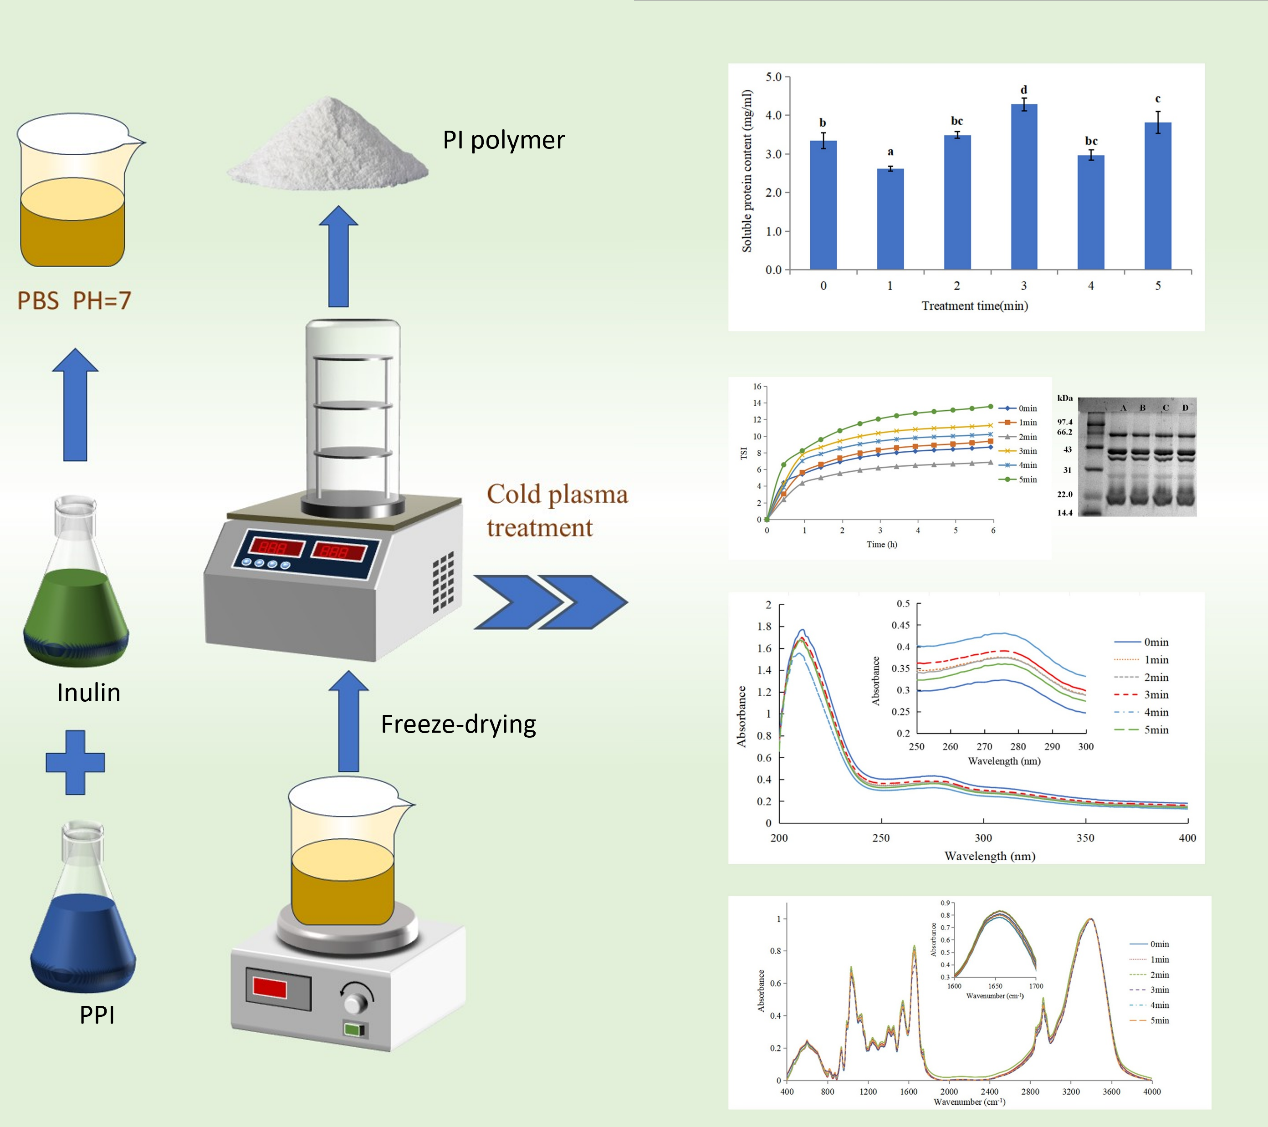

Supplement: Supplementary file 1 [file 269310a2b465bfcce8353eda.docx]
