# Supplementary material for: Insight into the non-covalent interaction mechanism between peanut protein and inulin
Source: Research Square preprint supplement (doi:10.21203/rs.3.rs-8217333/v1), 2025-12-16
Supplement: Supplementary file 3 [file c7b25de00d60779e995c7a58.docx]

**Highlights**

The temporal efficiency of the cold plasma has been enhanced.

Structural changes in the PI polymer after cold plasma treatment have been revealed.

The soluble protein content of peanut protein was enhanced by coupling with polymer.
