# Supplementary figures and images for: Insight into the non-covalent interaction mechanism between peanut protein and inulin
Source: Research Square preprint supplement (doi:10.21203/rs.3.rs-8217333/v1), 2025-12-16

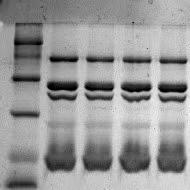


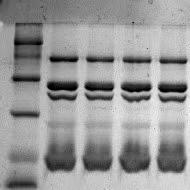

Supplement: Supplementary file 2 [file 4a7933185d059b5105fac977.docx]
